# Supplementary material for: Spatial Analysis of the Determinants, Management and Outcomes of Traumatic Brain Injury in Rwanda, 2024
Source: Research Square preprint supplement (doi:10.21203/rs.3.rs-7760419/v1), 2025-10-05
Supplement: Supplementary file 1 [file 4a88aeea5781e14b63b0b6a0.docx]

**Table S1: CT scan findings by type of traumatic brain injury (n=76)**

|  | **Type of traumatic brain injury** | | | | | |  |  |
| --- | --- | --- | --- | --- | --- | --- | --- | --- |
| **CT scan finding** | **mild (GCS:14-15)** | **%** | **moderate (GCS: 9-13)** | **%** | **Severe (GCS: 3-8)** | **%** | **Total** | **%** |
| Acute Subdural haemorrhage | 6 | 40.0 | 7 | 46.7 | 2 | 13.3 | 15 | 19.7 |
| CT normal | 9 | 75.0 | 3 | 25.0 | 0 | 0.0 | 12 | 15.8 |
| Epidural haemorrhage | 3 | 37.5 | 4 | 50.0 | 1 | 12.5 | 8 | 10.5 |
| Unspecific fracture | 4 | 100.0 | 0 | 0.0 | 0 | 0.0 | 4 | 5.3 |
| Chronic subdural haemorrhage | 2 | 50.0 | 2 | 50.0 | 0 | 0.0 | 4 | 5.3 |
| Epidural haemorrhage & Unspecified fracture | 1 | 50.0 | 1 | 50.0 | 0 | 0.0 | 2 | 2.6 |
| Epidural haemorrhage, Unspecific fracture & Haemorrhagic contusions | 2 | 100.0 | 0 | 0.0 | 0 | 0.0 | 2 | 2.6 |
| Epidural haemorrhage & Maxillofacial fracture | 1 | 50.0 | 1 | 50.0 | 0 | 0.0 | 2 | 2.6 |
| Contusions | 2 | 100.0 | 0 | 0.0 | 0 | 0.0 | 2 | 2.6 |
| Contusions & DAI | 0 | 0.0 | 2 | 100.0 | 0 | 0.0 | 2 | 2.6 |
| Unspecific fracture & Contusions | 1 | 50.0 | 1 | 50.0 | 0 | 0.0 | 2 | 2.6 |
| Unspecific fracture & Haemorrhagic contusions | 0 | 0.0 | 2 | 100.0 | 0 | 0.0 | 2 | 2.6 |
| Acute Subdural haemorrhage & Contusions | 0 | 0.0 | 1 | 100.0 | 0 | 0.0 | 1 | 1.3 |
| Acute Subdural haemorrhage & Haemorrhagic contusions | 0 | 0.0 | 1 | 100.0 | 0 | 0.0 | 1 | 1.3 |
| Acute Subdural haemorrhage & DAI | 0 | 0.0 | 0 | 0.0 | 1 | 100.0 | 1 | 1.3 |
| Acute Subdural haemorrhage, Unspecific fracture & Haemorrhagic contusions | 0 | 0.0 | 1 | 100.0 | 0 | 0.0 | 1 | 1.3 |
| Acute Subdural haemorrhage, Unspecific fracture & DAI | 0 | 0.0 | 1 | 100.0 | 0 | 0.0 | 1 | 1.3 |
| Acute Subdural haemorrhage, Unspecific fracture, DAI & Haemorrhagic contusions | 0 | 0.0 | 0 | 0.0 | 1 | 100.0 | 1 | 1.3 |
| Acute Subdural haemorrhage & Maxillofacial fracture | 1 | 100.0 | 0 | 0.0 | 0 | 0.0 | 1 | 1.3 |
| Epidural haemorrhage & Contusions | 0 | 0.0 | 0 | 0.0 | 1 | 100.0 | 1 | 1.3 |
| Epidural haemorrhage & DAI | 1 | 100.0 | 0 | 0.0 | 0 | 0.0 | 1 | 1.3 |
| Epidural & Subdural | 0 | 0.0 | 1 | 100.0 | 0 | 0.0 | 1 | 1.3 |
| Epidural, Subdural & Maxillofacial fracture | 0 | 0.0 | 1 | 100.0 | 0 | 0.0 | 1 | 1.3 |
| Maxillofacial fracture, DAI & Haemorrhagic contusions | 1 | 100.0 | 0 | 0.0 | 0 | 0.0 | 1 | 1.3 |
| Depressed skull fracture | 1 | 100.0 | 0 | 0.0 | 0 | 0.0 | 1 | 1.3 |
| Interventricular haemorrhage | 1 | 100.0 | 0 | 0.0 | 0 | 0.0 | 1 | 1.3 |
| Epidural & Subarachnoid | 0 | 0.0 | 0 | 0.0 | 1 | 100.0 | 1 | 1.3 |
| Intracerebral haemorrhage | 0 | 0.0 | 1 | 100.0 | 0 | 0.0 | 1 | 1.3 |
| Intracerebral haemorrhage & Depressed skull fracture | 1 | 100.0 | 0 | 0.0 | 0 | 0.0 | 1 | 1.3 |
| Haemorrhagic contusion & Oedema | 0 | 0.0 | 1 | 100.0 | 0 | 0.0 | 1 | 1.3 |
| DAI & Oedema | 0 | 0.0 | 0 | 0.0 | 1 | 100.0 | 1 | 1.3 |
| **Total** | **37** | 48.7 | **31** | 40.8 | **8** | 10.5 | **76** | **100.0** |

**Table S2: Complications during hospitalization by type of traumatic brain injury**

|  |  | | **Types of traumatic brain injury** | | | |  | |  |
| --- | --- | --- | --- | --- | --- | --- | --- | --- | --- |
| **Complicate** |  | | **mild (GCS:14-15)** | **moderate (GCS: 9-13)** | **severe (GCS: 3-8)** | **Total** | | **Pat*** | **Res**** |
| **Complication absent** | Count | 10 | | 0 | 0 | 10 | |  |  |
|  | Expected Count | 5 | | 4 | 1 | 10 | |  |  |
|  | % within Total types of TBI | 25.60% | | 0.00% | 0.00% | 12.80% | | 25.60% |  |
|  | Std. Residual | 2.2 | | -2 | -1 |  | |  | 5.2 |
| **Physical complications** | Count | 16 | | 3 | 1 | 20 | |  |  |
|  | Expected Count | 10 | | 7.9 | 2.1 | 20 | |  |  |
|  | % within Total types of TBI | 41.00% | | 9.70% | 12.50% | 25.60% | | 18.80% |  |
|  | Std. Residual | 1.9 | | -1.8 | -0.7 |  | |  | 4.4 |
| **Physical & behavioural/memory** | Count | 1 | | 0 | 0 | 1 | |  |  |
|  | Expected Count | 0.5 | | 0.4 | 0.1 | 1 | |  |  |
|  | % within Total types of TBI | 2.60% | | 0.00% | 0.00% | 1.30% | | 2.60% |  |
|  | Std. Residual | 0.7 | | -0.6 | -0.3 |  | |  | 1.6 |
| **Physical & behavioural/memory complications** | Count | 1 | | 0 | 0 | 1 | |  |  |
|  | Expected Count | 0.5 | | 0.4 | 0.1 | 1 | |  |  |
|  | % within Total types of TBI | 2.60% | | 0.00% | 0.00% | 1.30% | | 2.60% |  |
|  | Std. Residual | 0.7 | | -0.6 | -0.3 |  | |  | 1.6 |
| **Alteration of conscious** | Count | 3 | | 3 | 1 | 7 | |  |  |
|  | Expected Count | 3.5 | | 2.8 | 0.7 | 7 | |  |  |
|  | % within Total types of TBI | 7.70% | | 9.70% | 12.50% | 9.00% | | -4.90% |  |
|  | Std. Residual | -0.3 | | 0.1 | 0.3 |  | |  | 0.5 |
| **Alteration of conscious & Physical complications** | Count | 6 | | 23 | 6 | 35 | |  |  |
|  | Expected Count | 17.5 | | 13.9 | 3.6 | 35 | |  |  |
|  | % within Total types of TBI | 15.40% | | 74.20% | 75.00% | 44.90% | | -14.60% |  |
|  | Std. Residual | -2.7 | | 2.4 | 1.3 |  | |  | 3.8 |
| **Alteration of conscious, Physical & Sensory complications** | Count | 1 | | 0 | 0 | 1 | |  |  |
|  | Expected Count | 0.5 | | 0.4 | 0.1 | 1 | |  |  |
|  | % within Total types of TBI | 2.60% | | 0.00% | 0.00% | 1.30% | | 2.60% |  |
|  | Std. Residual | 0.7 | | -0.6 | -0.3 |  | |  | 1.6 |
| **Alteration of conscious, Physical & behavioural/memory** | Count | 1 | | 1 | 0 | 2 | |  |  |
|  | Expected Count | 1 | | 0.8 | 0.2 | 2 | |  |  |
|  | % within Total types of TBI | 2.60% | | 3.20% | 0.00% | 2.60% | | 0.60% |  |
|  | Std. Residual | 0 | | 0.2 | -0.5 |  | |  | 0.7 |
| **Alteration of conscious, Physical, Communication & behavioural/memory** | Count | 0 | | 1 | 0 | 1 | |  |  |
|  | Expected Count | 0.5 | | 0.4 | 0.1 | 1 | |  |  |
|  | % within Total types of TBI | 0.00% | | 3.20% | 0.00% | 1.30% | | 3.20% |  |
|  | Std. Residual | -0.7 | | 1 | -0.3 |  | |  | 2.0 |

*Pattern of percentage within types of TBI. ** Residual difference
